# Supplementary material for: Changes in bone macro- and microstructure in diabetic obese mice revealed by high resolution microfocus X-ray computed tomography
Source: PubMed Central journal article supplement (PMC5069481; doi:10.1038/srep35517), 2016-10-19
Supplement: srep35517-s1.pdf [file srep35517-s1.pdf]

1 **Changes in bone macro- and microstructure in diabetic obese**  
2 **mice revealed by high resolution microfocus X-ray computed**  
3 **tomography**

4  
5 **G. Kerckhofs<sup>1, 2,+,\*</sup>, M. Durand<sup>1,2,3,4,+</sup>, R. Vangoitsenhoven<sup>5</sup>, C. Marin<sup>1, 2</sup>, B.**  
6 **Van der Schueren<sup>5</sup>, G. Carmeliet<sup>5</sup>, F. Luyten<sup>1, 2</sup>, L. Geris<sup>2,6,7</sup>, K.**  
7 **Vandamme<sup>2,8</sup>**

8  
9 **Supplementary data**

10 **Mechanical testing**

11 After harvesting, the femurs were kept at -80°C while being wetted in PBS-soaked cotton  
12 tissue (n = 4 per group). Prior to testing, the samples were thawed, while being kept humid.  
13 All the samples were subjected to a 3-point bending test using a custom-made 3-point bending  
14 set-up that was mounted on a BOSE Test Bench (LM1, EnduraTEC Systems Group, Bose  
15 Corp., Minnetonka, MN, USA). The femurs were placed on their posterior surface on the rigid  
16 supporting beams with rounded edges (1 mm diameter) to avoid shear loading and cutting.  
17 The length of the span was 6 mm for all samples. The femurs were centred on the supporting  
18 beams and the pressing force was applied directly to their anterior side. Before the actual  
19 testing, a stabilizing pre-load of 1N and 3N was applied to the midshaft of the femurs. The  
20 bending load, a rate of 0.1mm/s, was applied to the femurs until failure.  
21 From the load-displacement curves, the bending stiffness of the samples was determined  
22 (Suppl.Fig. S1). Normal ageing resulted in a significantly increased stiffness (36% –  
23 p=0.0001), while obesity-driven type 2 diabetes decreased the stiffness significantly (-17% –  
24 p=0.029).

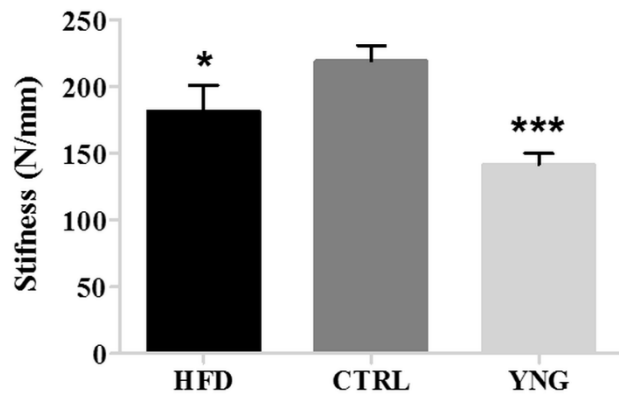

1

2 **Supplementary figure S1:** Bending stiffness, derived from a 3-point bending test, of femurs  
 3 of the HFD, CTRL and YNG groups. n=4/group.

4 **Sensitivity of the despeckling step**

5 To evaluate the sensitivity of the despeckling step on the cortical lacunar porosity, lacunar  
 6 diameter and number of lacunae, and to determine the most optimal despeckling value for our  
 7 study, we ranged the white speckle volume from 220  $\mu\text{m}^3$  up to 340  $\mu\text{m}^3$  in steps of 30  $\mu\text{m}^3$ ,  
 8 and also included more extreme values (150  $\mu\text{m}^3$ , 450 $\mu\text{m}^3$  and 550  $\mu\text{m}^3$ ). When comparing the  
 9 cortical lacunar porosity, lacunar diameter and number of lacunae between the CTRL and  
 10 HFD group and between the CTRL and YNG group, for none of the despeckling volumes  
 11 significant differences were found, even not for the extreme values (Suppl.Fig. S2). Also, the  
 12 same trends were noticed for the despeckling volumes from 150  $\mu\text{m}^3$  up to 340  $\mu\text{m}^3$ , namely a  
 13 decreasing trend in lacunar porosity and density due to ageing and HFD, and on average a  
 14 lower lacunar diameter for the CTRL group compared to both the YNG and the HFD group,  
 15 and this was confirmed by other studies. For the larger despeckling volume (450  $\mu\text{m}^3$  and 550  
 16  $\mu\text{m}^3$ ), the trends altered, suggesting that changing the despeckling volume within the range of  
 17 150  $\mu\text{m}^3$  up to 340  $\mu\text{m}^3$  did not have an impact on the final outcome.

18 Furthermore, the derivative of the average cortical lacunar porosity, lacunar diameter and  
 19 number of lacunae for the three groups in function of the despeckling volume was determined.

1 For the first two parameters a maximum was found around 280-330  $\mu\text{m}^3$ , indicating that  
 2 between these values, the influence of the despeckling value was the least. For the latter,  
 3 however, no maximum was found. Based on these results, we selected a threshold of 280  $\mu\text{m}^3$   
 4 as lower limit despeckling volume.

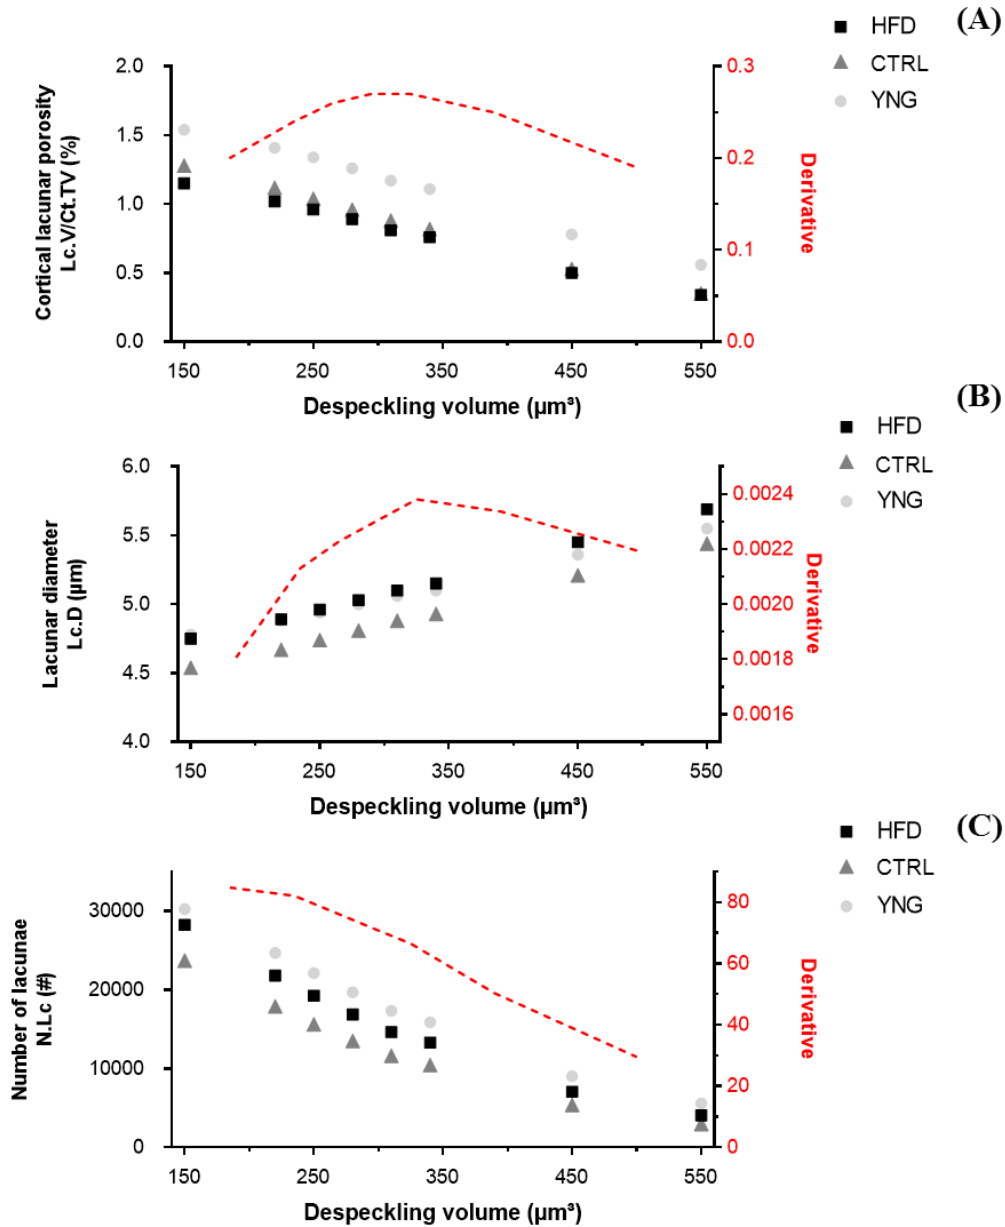

5  
 6 **Supplementary figure S2:** HR-microCT-based analysis of the (A) cortex lacunar porosity,  
 7 (B) lacunar diameter and (C) number of lacunae density in function of the despeckling

- 1 volume for the HFD, CTRL and YNG groups, along with the derivative of this function
- 2 averaged over the three animal groups.  $n=7-8/\text{group}$ .
